# Supplementary material for: Pattern formation in multiplex networks
Source: PubMed Central journal article supplement (PMC4455352; doi:10.1038/srep10840), 2015-06-04
Supplement: srep10840-s1.pdf [file srep10840-s1.pdf]

# Pattern formation in multiplex networks

## -Supplementary information-

Nikos E. Kouvaris<sup>1,\*</sup>, Shigefumi Hata<sup>2</sup>, and Albert Díaz-Guilera<sup>1</sup>

<sup>1</sup>Department of Physics, University of Barcelona, Martí i Franqués 1, E-08028, Barcelona, Spain

<sup>2</sup>Department of Mathematical Science and Advanced Technology, Japan Agency for Marine-Earth Science and Technology, 236-0001 Kanagawa, Japan

\*nikos.kouvaris@ub.edu

### ABSTRACT

Supplementary movies showing the formation of Turing patterns in multiplex networks are available.

**Supplementary Movie S1** shows the formation of Turing pattern for the Mimura-Murray model with  $\sigma^{(v)} = \sigma^{(u)} = 0.12$  on a multiplex network with scale-free layers of  $N = 1,000$  nodes and mean degrees  $\langle k^{(v)} \rangle = 152$  and  $\langle k^{(u)} \rangle = 20$ . Nodes are ordered according to decreasing degrees  $k^{(u)}$ . This movie demonstrates in time the pattern formation mechanism that is described in Fig. 3 (b-e). Nodes denoted by stars are the same nodes that are denoted by stars in Fig. 3.

**Supplementary Movie S2** shows the formation of Turing pattern for the Mimura-Murray model with  $\sigma^{(v)} = \sigma^{(u)} = 0.12$  on a multiplex network with scale-free layers of  $N = 1,000$  nodes and mean degrees  $\langle k^{(v)} \rangle = 500$  and  $\langle k^{(u)} \rangle = 20$ . Nodes are ordered according to decreasing degrees  $k^{(u)}$ . This movie demonstrates in time the pattern formation mechanism that is described in Fig. 5 (a-f).
